# Supplementary material
Source: publisher figshare collection journal article supplement (https://acs.figshare.com/ndownloader/files/3915529)

# **8-Methyltryptanthrin-induced Differentiation of P19CL6 Embryonal Carcinoma Cells into Spontaneously Beating Cardiomyocyte-like Cells**

Kazuhiko Seya,<sup>\*,†</sup> Asako Yamaya,<sup>†,‡</sup> Sayuri Kamachi,<sup>†,§</sup> Mana Murakami,<sup>†,§</sup> Haruo Kitahara,<sup>§</sup> Jun  
Kawakami,<sup>‡</sup> Ken Okumura,<sup>⊥</sup> Manabu Murakami,<sup>†</sup> Shigeru Motomura,<sup>†</sup> and Ken-Ichi Furukawa<sup>†</sup>

<sup>†</sup>Department of Pharmacology, Hirosaki University Graduate School of Medicine, 5 Zaifu-cho, Hirosaki  
036-8562, Japan

<sup>‡</sup>Graduate School of Science and Technology, Hirosaki University, 3 Bunkyo-cho, Hirosaki 036-8561, Japan

<sup>§</sup>Faculty of Education, Hirosaki University, 1 Bunkyo-cho, Hirosaki 036-8560, Japan

<sup>⊥</sup>Department of Cardiology, Respiratory Medicine and Nephrology, Hirosaki University Graduate School of  
Medicine, 5 Zaifu-cho, Hirosaki 036-8562, Japan

## **Supporting Information**

---

\* To whom correspondence should be addressed. Tel: +81-172-39-5023, Fax: +81-172-39-5023.

E-mail: seya@cc.hirosaki-u.ac.jp.

## **Index**

### **For compound 3:**

- S1.  $^1\text{H}$  NMR Spectrum (500 MHz,  $\text{CDCl}_3$ ) of Compound **3**
- S2.  $^{13}\text{C}$  NMR Spectrum (125 MHz,  $\text{CDCl}_3$ ) of Compound **3**
- S3. HREIMS Spectrum of Compound **3**

### **For Compound 4:**

- S4.  $^1\text{H}$  NMR Spectrum (500 MHz,  $\text{CDCl}_3$ ) of Compound **4**
- S5.  $^{13}\text{C}$  NMR Spectrum (125 MHz,  $\text{CDCl}_3$ ) of Compound **4**
- S6. HREIMS Spectrum of Compound **4**

S1.  $^1\text{H}$  NMR Spectrum (500 MHz,  $\text{CDCl}_3$ ) of Compound **3**

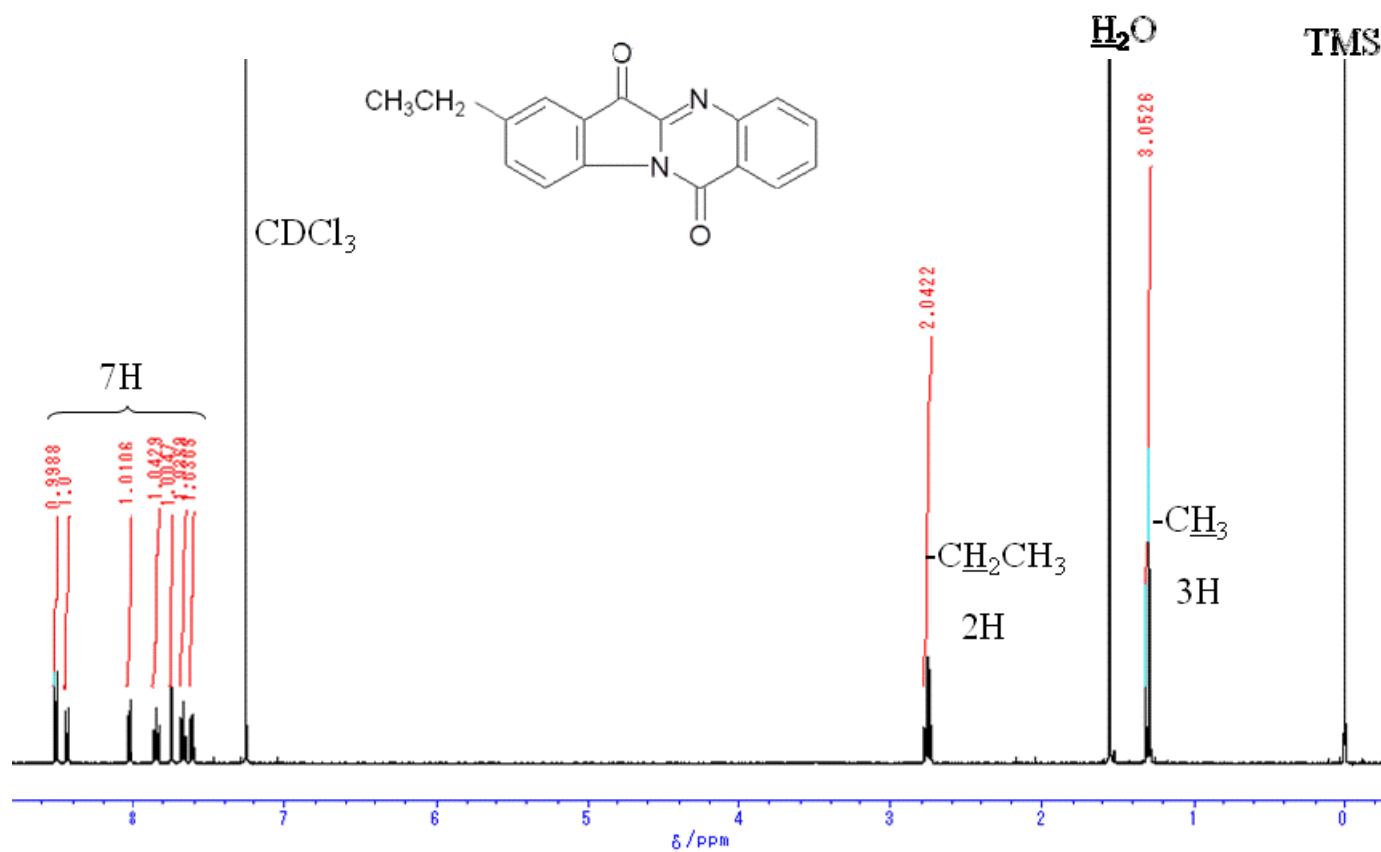

S2.  $^{13}\text{C}$  NMR Spectrum (125 MHz,  $\text{CDCl}_3$ ) of Compound **3**

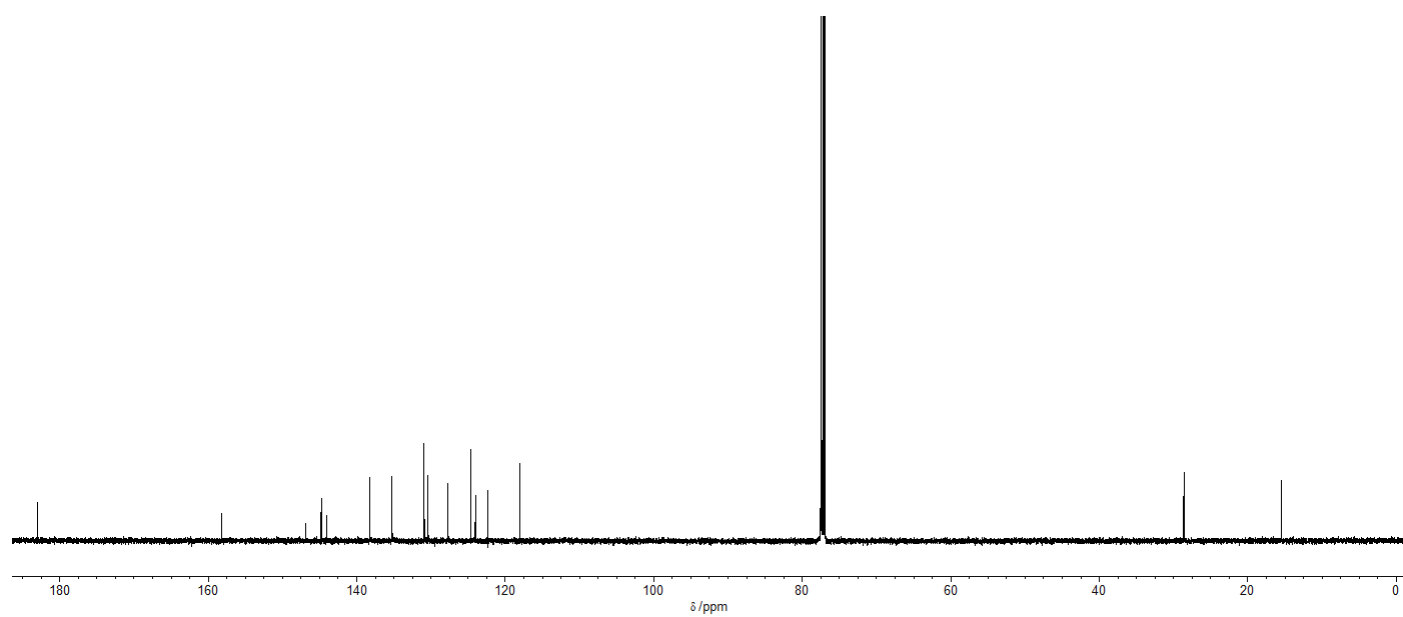

### S3. HREIMS Spectrum of Compound **3**

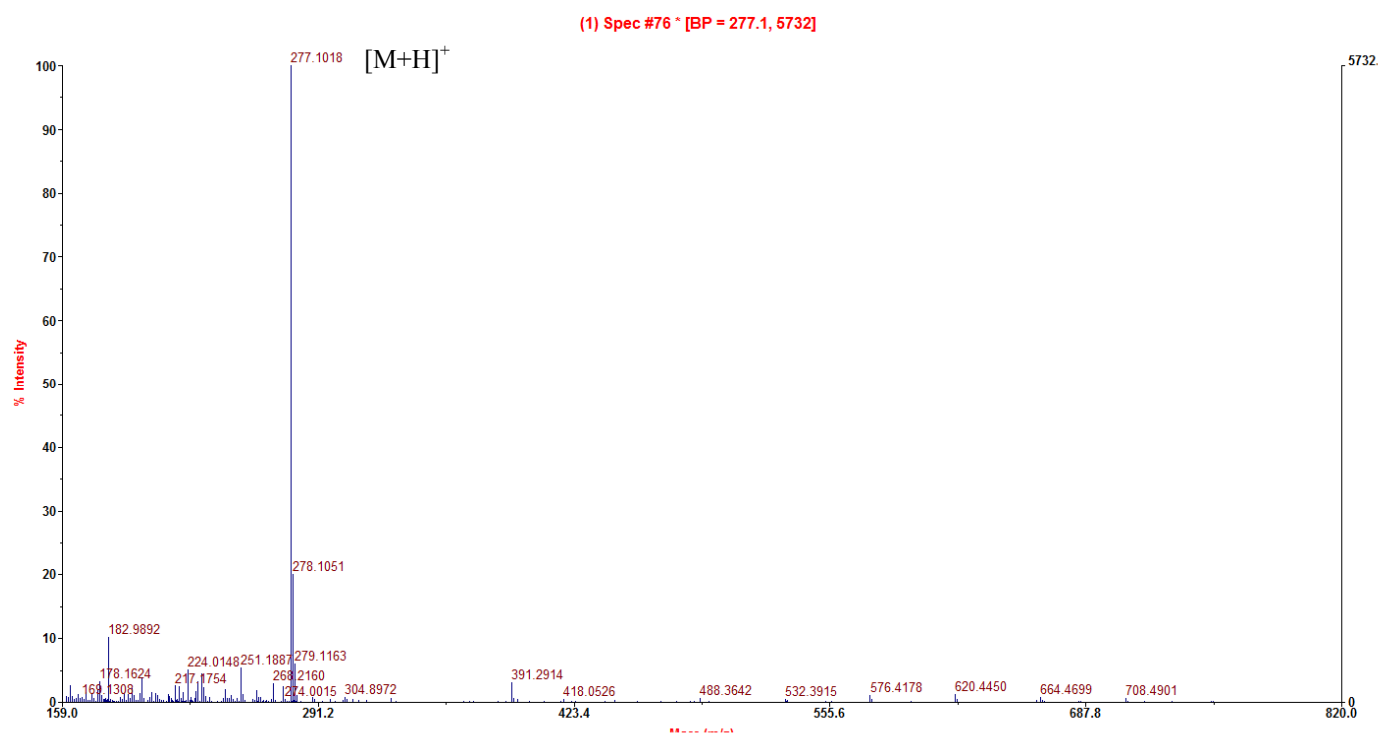

S4.  $^1\text{H}$  NMR Spectrum (500 MHz,  $\text{CDCl}_3$ ) of Compound **4**

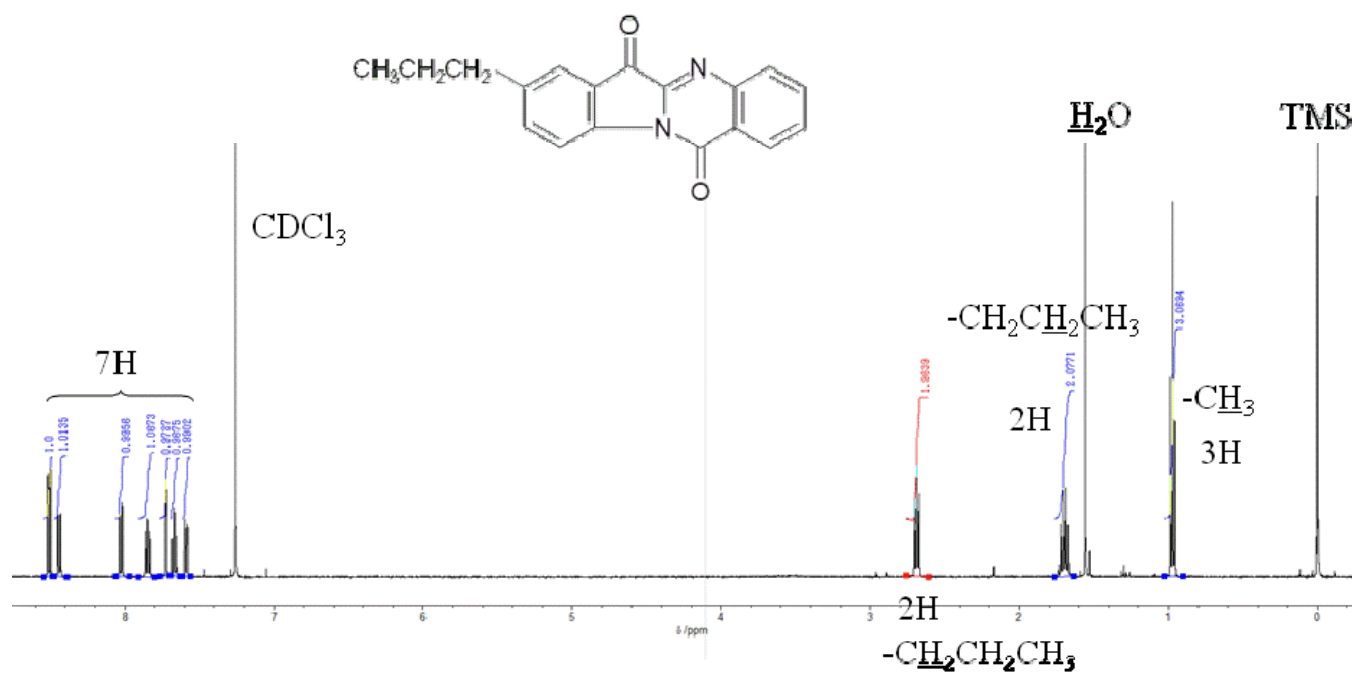

S5.  $^{13}\text{C}$  NMR Spectrum (125 MHz,  $\text{CDCl}_3$ ) of Compound **4**

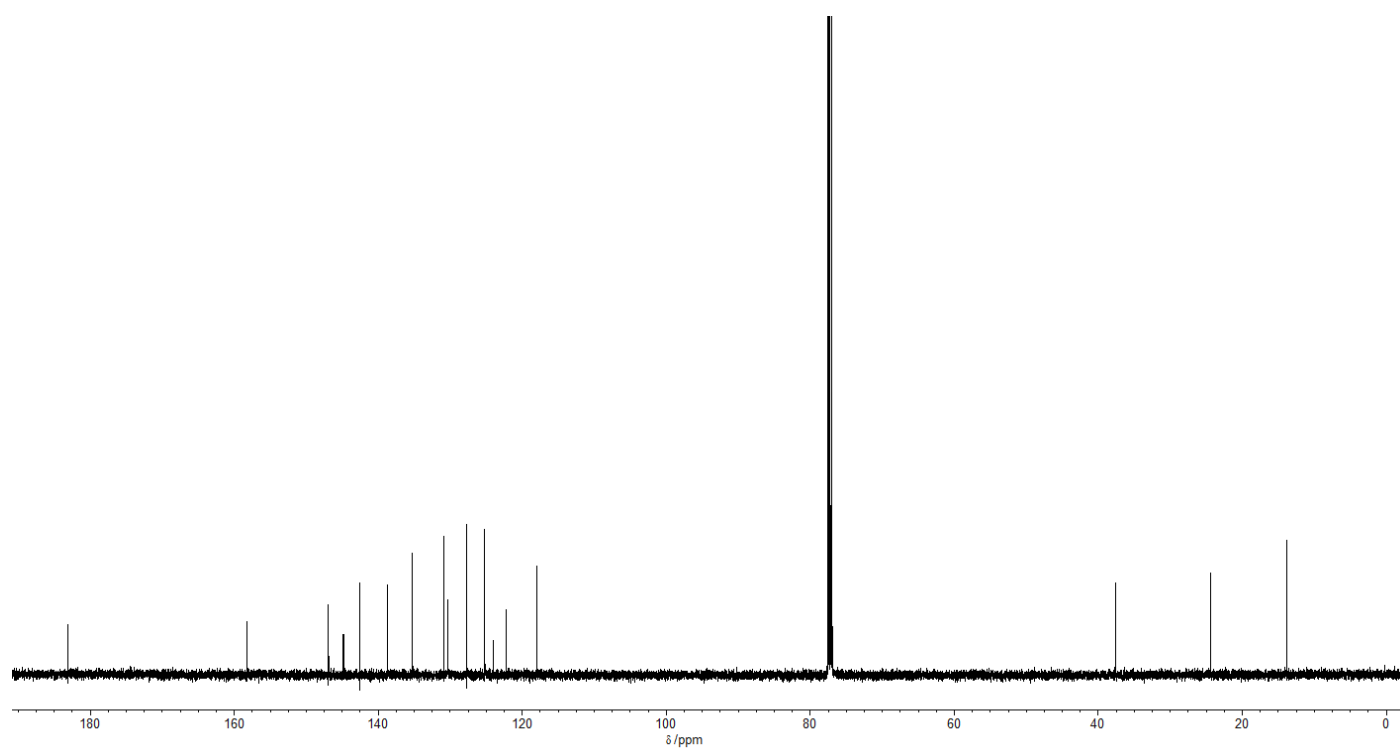

## S6. HREIMS Spectrum of Compound **4**

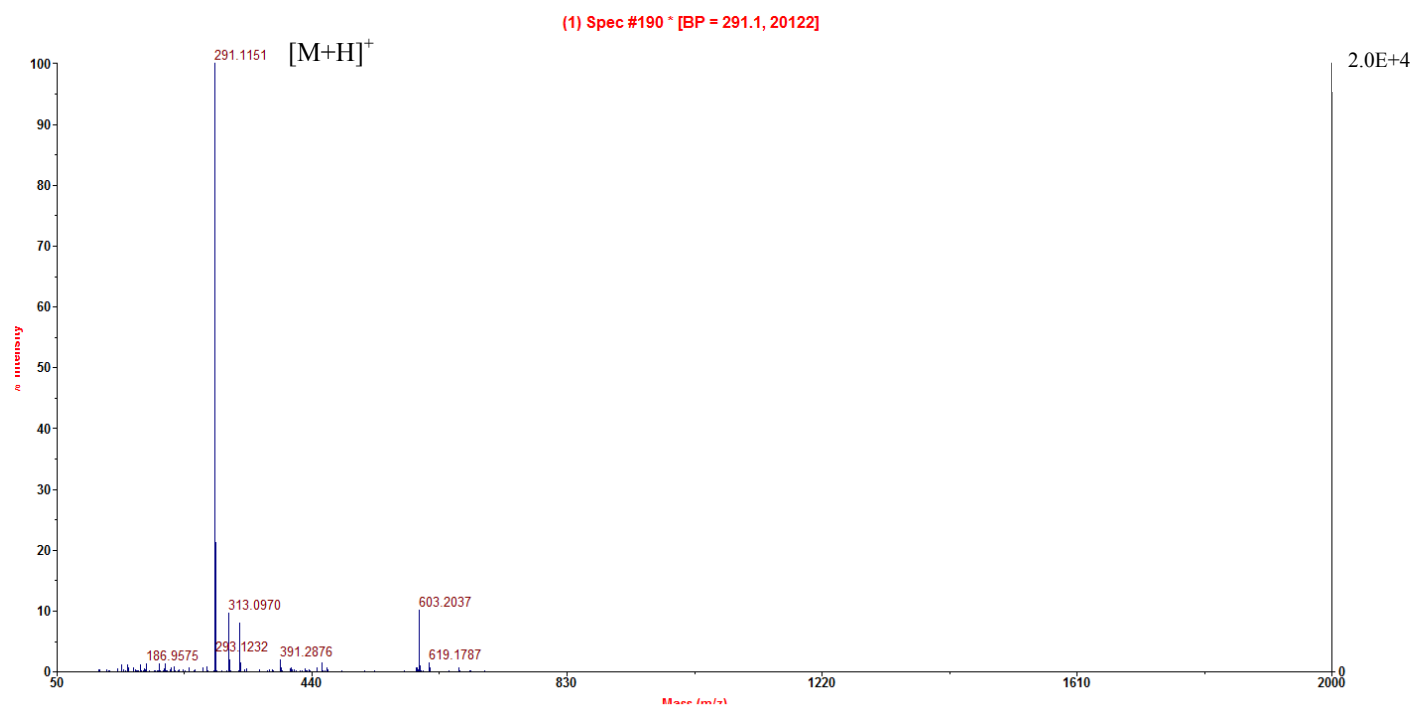

Supplement: Supplementary file 1 [file 3915529]
